# Supplementary material
Source: publisher figshare collection journal article supplement (https://acs.figshare.com/ndownloader/files/4083949)
Supplement: Supplementary file 1 [file 4083949]

**Supporting information for**  
**Flame Retardant Polyimide Cross-Linked with Polyhedral**  
**Oligomeric Octa(aminophenyl)silsesquioxane**

*Haibo Fan, Rongjie Yang\**

School of Materials Science & Engineering, National Laboratory of Flame Retardant Materials,  
Engineering Research Center of Fire-Safe Materials and Technology, Ministry of Education,  
Beijing Institute of Technology, Beijing 100081, People's Republic of China.

**\*Corresponding Author**

Prof. Rongjie Yang

Telephone +86-10-6891-2927

Fax +86-10-6891-4862

E-mail: [yrj@bit.edu.cn](mailto:yrj@bit.edu.cn)

### 3.2. Morphological Properties of PI/OAPS Composites

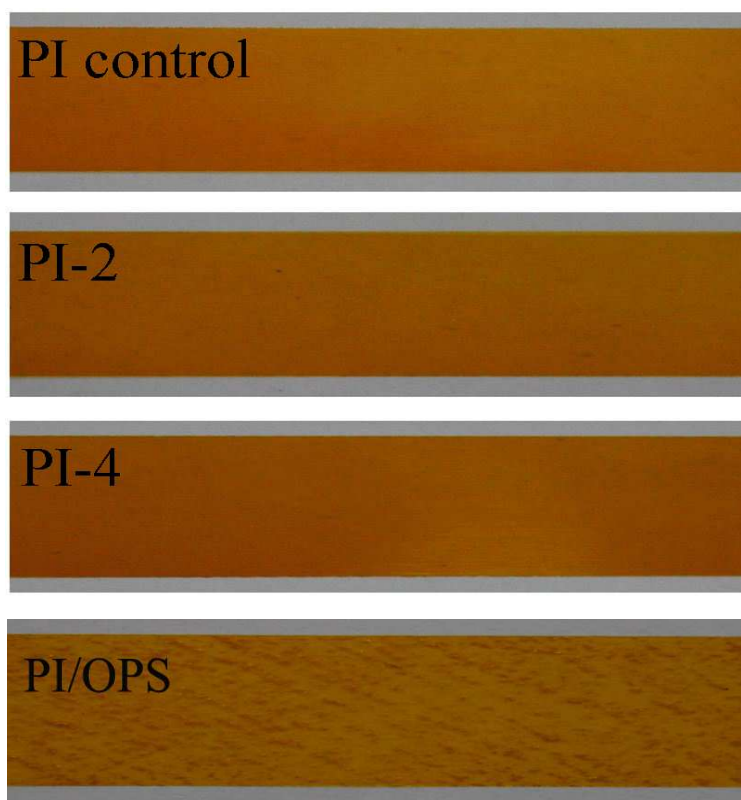

**Figure S1.** Photographs of PI composites.

### 3.5. Thermal Properties of PI/OAPS Composites

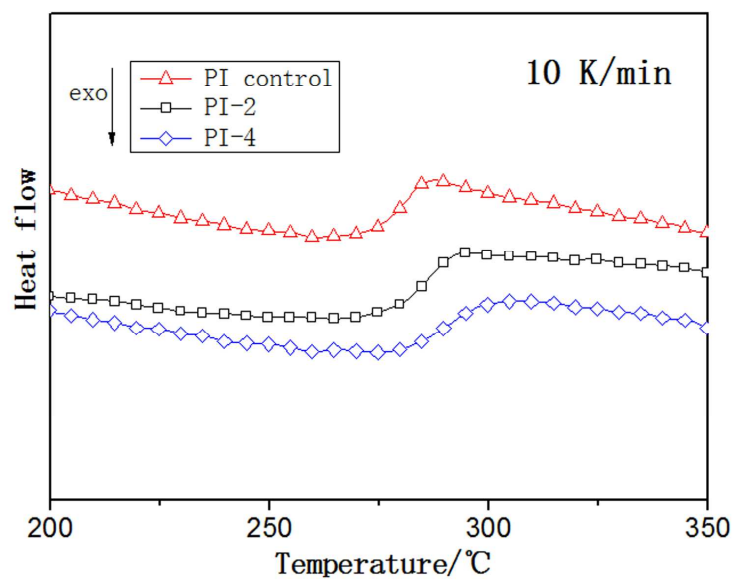

**Figure S2.** Differential scanning calorimetry curves of PI/OAPS composites.

### 3.8. Flame Retardancy Mechanism of PI/OAPS Composites

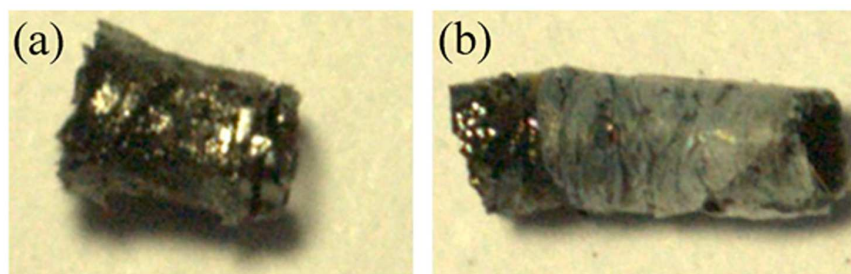

**Figure S3.** Photographs of the char residues after combustion at the oxygen concentration of 47%: (a) PI control, (b) PI-4.
